# Supplementary material for: Temporal Stability and Genetic Diversity of 48-Year-Old T-Series Phages
Source: PubMed Central journal article supplement (PMC8573959; doi:10.1128/msystems.00990-20), 2021-02-16
Supplement: msystems.00990-20-sf001.pdf [file msystems.00990-20-sf001.pdf]

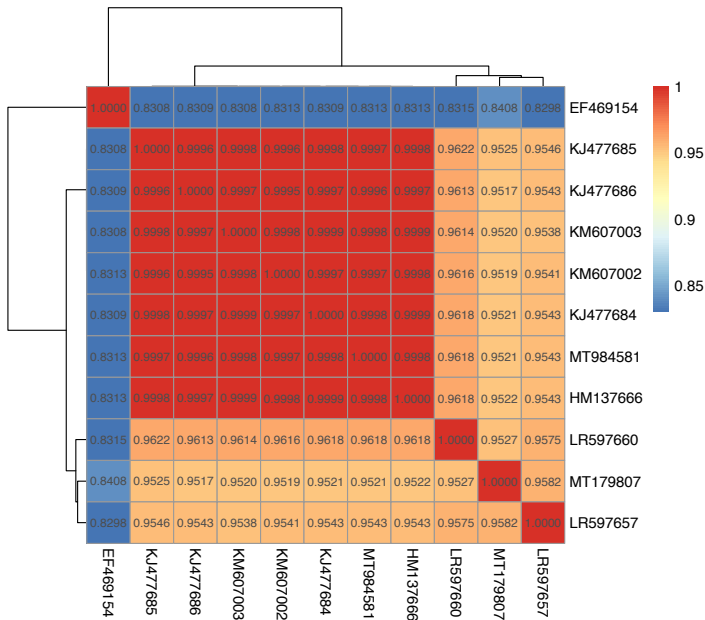

| Accession number | GenBank Entry Title                                       | Reference                      |
|------------------|-----------------------------------------------------------|--------------------------------|
| HM137666         | Enterobacteria phage T4T, complete genome                 | (Petrov et al 2010)            |
| KJ477684         | Enterobacteria phage T4 strain wild, complete genome      | (Bryson et al 2015)            |
| KJ477685         | Enterobacteria phage T4 strain 147, complete genome       | (Bryson et al 2015)            |
| KJ477686         | Enterobacteria phage T4 strain GT7, complete genome       | (Bryson et al 2015)            |
| KM607002         | Enterobacteria phage RB55, complete genome                | (Yaung et al 2015)             |
| KM607003         | Enterobacteria phage RB59, complete genome                | (Yaung et al 2015)             |
| EF469154         | Enterobacteria phage JS98, complete genome                | (Chibani-Chennoufi et al 2004) |
| LR597660         | Escherichia phage T4_ev151 genome assembly, chromosome: 1 | NA                             |
| MT179807         | Escherichia phage vB_EcoM_IME537, complete genome         | NA                             |
| LR597657         | Escherichia phage T4_ev240 genome assembly, chromosome: 1 | NA                             |

**References:**

Bryson AL, Hwang Y, Sherrill-Mix S, Wu GD, Lewis JD, Black L *et al* (2015). Covalent Modification of Bacteriophage T4 DNA Inhibits CRISPR-Cas9. *mBio* **6**: e00648.

Chibani-Chennoufi S, Canchaya C, Bruttin A, Brüssow H (2004). Comparative genomics of the T4-Like Escherichia coli phage JS98: implications for the evolution of T4 phages. *Journal of bacteriology* **186**: 8276-8286.

Petrov VM, Ratnayaka S, Nolan JM, Miller ES, Karam JD (2010). Genomes of the T4-related bacteriophages as windows on microbial genome evolution. *Virology journal* **7**: 292.

Yaung SJ, Esvelt KM, Church GM (2015). Complete Genome Sequences of T4-Like Bacteriophages RB3, RB5, RB6, RB7, RB9, RB10, RB27, RB33, RB55, RB59, and RB68. *Genome announcements* **3**.
